# Supplementary material
Source: PubMed Central journal article supplement (PMC4411534)
Supplement: supp_lgu028_jnci_JNCI_13_2198_s02.pdf [file supp_lgu028_jnci_JNCI_13_2198_s02.pdf]

**Up-regulated (> 1.20-fold differential change from baseline to post-intervention follow-up)**

| Gene         | Change over time<br>(Log <sub>2</sub> expression units, Post - Baseline) |        |            | Fold-change (Post - Baseline) |      |            |
|--------------|--------------------------------------------------------------------------|--------|------------|-------------------------------|------|------------|
|              | CBT                                                                      | TCC    | Difference | CBT                           | TCC  | Difference |
| LOC649923    | -0.351                                                                   | 0.107  | 0.458      | 0.78                          | 1.08 | 1.37       |
| IGJ          | -0.134                                                                   | 0.278  | 0.412      | 0.91                          | 1.21 | 1.33       |
| LOC401845    | -0.249                                                                   | 0.136  | 0.385      | 0.84                          | 1.10 | 1.31       |
| CD160        | -0.002                                                                   | 0.324  | 0.325      | 1.00                          | 1.25 | 1.25       |
| LOC642113    | 0.016                                                                    | 0.334  | 0.318      | 1.01                          | 1.26 | 1.25       |
| CX3CR1       | 0.337                                                                    | 0.653  | 0.316      | 1.26                          | 1.57 | 1.25       |
| LOC100132499 | 0.002                                                                    | 0.306  | 0.304      | 1.00                          | 1.24 | 1.23       |
| FCRLA        | 0.096                                                                    | 0.399  | 0.303      | 1.07                          | 1.32 | 1.23       |
| FCRL6        | -0.036                                                                   | 0.263  | 0.299      | 0.98                          | 1.20 | 1.23       |
| LOC647506    | -0.031                                                                   | 0.263  | 0.294      | 0.98                          | 1.20 | 1.23       |
| GIMAP4       | 0.034                                                                    | 0.327  | 0.292      | 1.02                          | 1.25 | 1.22       |
| TCL1A        | 0.077                                                                    | 0.366  | 0.289      | 1.05                          | 1.29 | 1.22       |
| LOC652493    | 0.013                                                                    | 0.292  | 0.279      | 1.01                          | 1.22 | 1.21       |
| GIMAP5       | -0.117                                                                   | 0.162  | 0.279      | 0.92                          | 1.12 | 1.21       |
| UBA3         | 0.079                                                                    | 0.354  | 0.276      | 1.06                          | 1.28 | 1.21       |
| DNCL1        | 0.120                                                                    | 0.395  | 0.275      | 1.09                          | 1.31 | 1.21       |
| IFI27        | -0.312                                                                   | -0.041 | 0.271      | 0.81                          | 0.97 | 1.21       |
| CRYZ         | -0.087                                                                   | 0.183  | 0.270      | 0.94                          | 1.14 | 1.21       |
| SLAMF6       | 0.006                                                                    | 0.271  | 0.265      | 1.00                          | 1.21 | 1.20       |

**Down-regulated (> 1.20-fold differential change from baseline to post-intervention follow-up)**

| Gene      | Change over time<br>(Log <sub>2</sub> expression units, Post - Baseline) |        |            | Fold-change (Post - Baseline) |      |            |
|-----------|--------------------------------------------------------------------------|--------|------------|-------------------------------|------|------------|
|           | CBT                                                                      | TCC    | Difference | CBT                           | TCC  | Difference |
| HDC       | 0.065                                                                    | -0.599 | -0.663     | 1.05                          | 0.66 | 0.63       |
| OLR1      | -0.092                                                                   | -0.666 | -0.574     | 0.94                          | 0.63 | 0.67       |
| DEFA1     | 0.392                                                                    | -0.121 | -0.512     | 1.31                          | 0.92 | 0.70       |
| TNF       | 0.277                                                                    | -0.211 | -0.488     | 1.21                          | 0.86 | 0.71       |
| DEFA3     | 0.295                                                                    | -0.164 | -0.459     | 1.23                          | 0.89 | 0.73       |
| PI3       | 0.260                                                                    | -0.197 | -0.457     | 1.20                          | 0.87 | 0.73       |
| ABCA1     | 0.013                                                                    | -0.429 | -0.441     | 1.01                          | 0.74 | 0.74       |
| MMP9      | 0.067                                                                    | -0.367 | -0.434     | 1.05                          | 0.78 | 0.74       |
| G0S2      | 0.384                                                                    | -0.049 | -0.432     | 1.30                          | 0.97 | 0.74       |
| TCN1      | 0.306                                                                    | -0.120 | -0.426     | 1.24                          | 0.92 | 0.74       |
| DEFA1B    | 0.228                                                                    | -0.195 | -0.423     | 1.17                          | 0.87 | 0.75       |
| IL1B      | 0.558                                                                    | 0.137  | -0.421     | 1.47                          | 1.10 | 0.75       |
| CLC       | 0.354                                                                    | -0.052 | -0.406     | 1.28                          | 0.96 | 0.75       |
| PHLDA1    | -0.001                                                                   | -0.405 | -0.405     | 1.00                          | 0.76 | 0.76       |
| TNFRSF12A | -0.169                                                                   | -0.570 | -0.401     | 0.89                          | 0.67 | 0.76       |
| CCL2      | -0.094                                                                   | -0.480 | -0.385     | 0.94                          | 0.72 | 0.77       |
| AQP9      | 0.291                                                                    | -0.090 | -0.382     | 1.22                          | 0.94 | 0.77       |
| CPA3      | 0.182                                                                    | -0.193 | -0.375     | 1.13                          | 0.87 | 0.77       |
| SLC7A5    | -0.189                                                                   | -0.561 | -0.372     | 0.88                          | 0.68 | 0.77       |
| SMAD7     | -0.032                                                                   | -0.401 | -0.369     | 0.98                          | 0.76 | 0.77       |

|           |        |        |        |      |      |      |
|-----------|--------|--------|--------|------|------|------|
| EGR1      | 0.484  | 0.121  | -0.362 | 1.40 | 1.09 | 0.78 |
| MS4A2     | 0.198  | -0.163 | -0.361 | 1.15 | 0.89 | 0.78 |
| C15ORF48  | -0.059 | -0.418 | -0.359 | 0.96 | 0.75 | 0.78 |
| NRIP3     | -0.016 | -0.374 | -0.359 | 0.99 | 0.77 | 0.78 |
| ZNF331    | -0.089 | -0.448 | -0.359 | 0.94 | 0.73 | 0.78 |
| TP53INP2  | -0.029 | -0.379 | -0.350 | 0.98 | 0.77 | 0.78 |
| C14ORF4   | 0.024  | -0.320 | -0.344 | 1.02 | 0.80 | 0.79 |
| OSM       | 0.296  | -0.043 | -0.339 | 1.23 | 0.97 | 0.79 |
| DIRC2     | 0.130  | -0.202 | -0.332 | 1.09 | 0.87 | 0.79 |
| HBM       | 0.190  | -0.139 | -0.329 | 1.14 | 0.91 | 0.80 |
| ALPL      | 0.133  | -0.196 | -0.329 | 1.10 | 0.87 | 0.80 |
| IL8RB     | 0.151  | -0.177 | -0.328 | 1.11 | 0.88 | 0.80 |
| EPB42     | 0.269  | -0.058 | -0.327 | 1.20 | 0.96 | 0.80 |
| IER3      | 0.176  | -0.147 | -0.323 | 1.13 | 0.90 | 0.80 |
| GATA2     | 0.170  | -0.151 | -0.320 | 1.12 | 0.90 | 0.80 |
| LOC649143 | 0.290  | -0.024 | -0.314 | 1.22 | 0.98 | 0.80 |
| SERTAD1   | -0.014 | -0.328 | -0.313 | 0.99 | 0.80 | 0.80 |
| CAMP      | 0.181  | -0.131 | -0.312 | 1.13 | 0.91 | 0.81 |
| C17ORF91  | 0.087  | -0.223 | -0.310 | 1.06 | 0.86 | 0.81 |
| HBEGF     | 0.363  | 0.057  | -0.305 | 1.29 | 1.04 | 0.81 |
| TMEM88    | -0.048 | -0.353 | -0.305 | 0.97 | 0.78 | 0.81 |
| HBD       | 0.297  | -0.003 | -0.300 | 1.23 | 1.00 | 0.81 |
| SLC25A37  | 0.038  | -0.261 | -0.298 | 1.03 | 0.83 | 0.81 |
| SPRYD5    | 0.128  | -0.171 | -0.298 | 1.09 | 0.89 | 0.81 |
| DUSP8     | -0.172 | -0.466 | -0.294 | 0.89 | 0.72 | 0.82 |
| NFKBIE    | 0.072  | -0.222 | -0.294 | 1.05 | 0.86 | 0.82 |
| NP        | 0.046  | -0.246 | -0.292 | 1.03 | 0.84 | 0.82 |
| AXUD1     | 0.083  | -0.209 | -0.291 | 1.06 | 0.87 | 0.82 |
| MIDN      | 0.015  | -0.275 | -0.291 | 1.01 | 0.83 | 0.82 |
| ACSL1     | 0.079  | -0.212 | -0.290 | 1.06 | 0.86 | 0.82 |
| GADD45G   | -0.042 | -0.330 | -0.288 | 0.97 | 0.80 | 0.82 |
| AHSP      | 0.219  | -0.068 | -0.287 | 1.16 | 0.95 | 0.82 |
| LOC654103 | 0.145  | -0.139 | -0.285 | 1.11 | 0.91 | 0.82 |
| ADM       | 0.101  | -0.181 | -0.282 | 1.07 | 0.88 | 0.82 |
| CHD1      | -0.168 | -0.446 | -0.278 | 0.89 | 0.73 | 0.82 |
| CMTM2     | 0.230  | -0.048 | -0.278 | 1.17 | 0.97 | 0.82 |
| CCR3      | 0.168  | -0.109 | -0.278 | 1.12 | 0.93 | 0.82 |
| ZNF295    | -0.065 | -0.342 | -0.277 | 0.96 | 0.79 | 0.83 |
| ZC3H12A   | 0.002  | -0.274 | -0.276 | 1.00 | 0.83 | 0.83 |
| PLEKHO2   | 0.015  | -0.260 | -0.274 | 1.01 | 0.84 | 0.83 |
| RELB      | 0.026  | -0.248 | -0.274 | 1.02 | 0.84 | 0.83 |
| PTGES     | 0.042  | -0.230 | -0.271 | 1.03 | 0.85 | 0.83 |
| C19ORF59  | 0.379  | 0.108  | -0.270 | 1.30 | 1.08 | 0.83 |
| SPRY2     | 0.033  | -0.236 | -0.270 | 1.02 | 0.85 | 0.83 |
| S1PR3     | 0.230  | -0.038 | -0.268 | 1.17 | 0.97 | 0.83 |
| CD300LB   | 0.140  | -0.128 | -0.268 | 1.10 | 0.92 | 0.83 |
| CSF3R     | 0.154  | -0.112 | -0.265 | 1.11 | 0.93 | 0.83 |
| GPR84     | -0.017 | -0.282 | -0.265 | 0.99 | 0.82 | 0.83 |
